# Supplementary material for: Improved Captures of the Invasive Brown Marmorated Stink Bug, Halyomorpha halys, Using a Novel Multimodal Trap
Source: MDPI journal article supplement (doi:10.3390/insects13060527), 2022-06-07
Supplement: s1 [file s1]

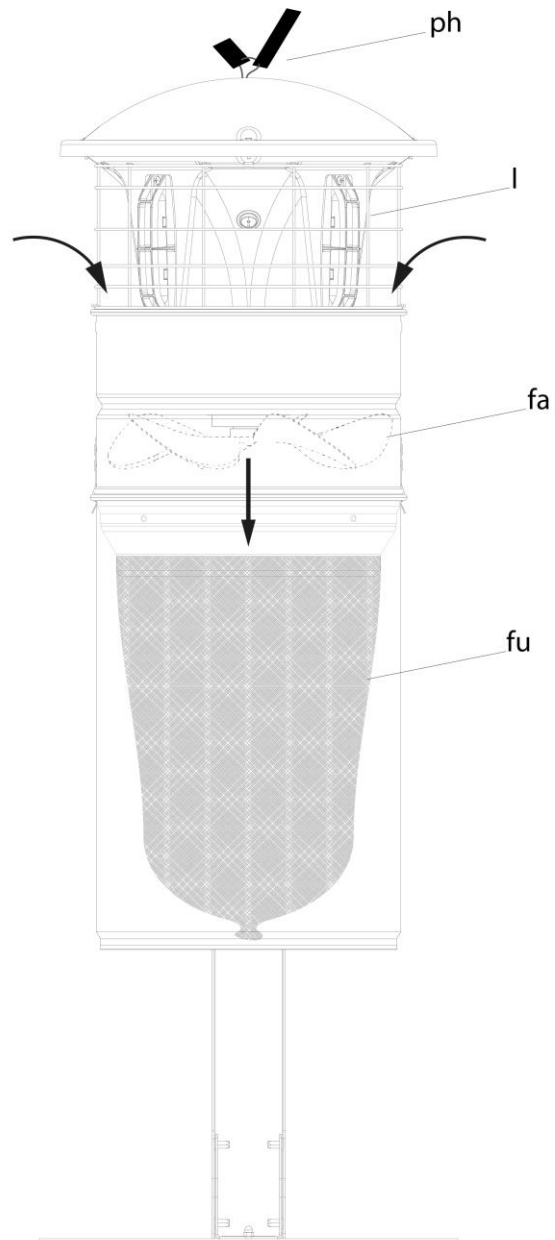

**Figure S1.** Diagram of the multimodal trap. “ph”= pheromonal lure; “l” = LED light covered by a green-emitting light plastic; “fa”= electric fan; “fu”= collection funnel
